# Supplementary material for: New Canary Islands Roman mediated settlement hypothesis deduced from coalescence ages of curated maternal indigenous lineages
Source: Sci Rep. 2024 May 15;14:11150. doi: 10.1038/s41598-024-61731-x (PMC11096394; doi:10.1038/s41598-024-61731-x)
Supplement: Supplementary file 2 — Supplementary Information. [file 41598_2024_61731_MOESM2_ESM.xlsx]

## Sheet: SupplementaryBibiography
Supplementary Bibliography. Numbers in column A indicate matches detected in Stable 1. References without numbers in column A were screened but no matches were detected in them.
11	Aboukhalid R, Sturk-Andreaggi K, Bouabdellah M, Squalli D, Irwin JA, Amzazi S. Mitochondrial DNA control region variation from samples of the Moroccan population. Int J Legal Med. 2013 Jul;127(4):757-9. doi: 10.1007/s00414-012-0813-4. Epub 2013 Jan 3. PMID: 23283404.
47	Achilli A, Olivieri A, Pala M, Hooshiar Kashani B, Carossa V, Perego UA, Gandini F, Santoro A, Battaglia V, Grugni V, Lancioni H, Sirolla C, Bonfigli AR, Cormio A, Boemi M, Testa I, Semino O, Ceriello A, Spazzafumo L, Gadaleta MN, Marra M, Testa R, Franceschi C, Torroni A. Mitochondrial DNA backgrounds might modulate diabetes complications rather than T2DM as a whole. PLoS One. 2011;6(6):e21029. …
26	Achilli A, Olivieri A, Pala M, Metspalu E, Fornarino S, Battaglia V, Accetturo M, Kutuev I, Khusnutdinova E, Pennarun E, Cerutti N, Di Gaetano C, Crobu F, Palli D, Matullo G, Santachiara-Benerecetti AS, Cavalli-Sforza LL, Semino O, Villems R, Bandelt HJ, Piazza A, Torroni A. Mitochondrial DNA variation of modern Tuscans supports the near eastern origin of Etruscans. Am J Hum Genet. 2007 Apr;80(4)…
	Baeta M, Núñez C, Cardoso S, Palencia-Madrid L, Piñeiro-Hermida S, Arriba-Barredo M, Villanueva-Millán MJ, M de Pancorbo M. Different Evolutionary History for Basque Diaspora Populations in USA and Argentina Unveiled by Mitochondrial DNA Analysis. PLoS One. 2015 Dec 14;10(12):e0144919. doi: 10.1371/journal.pone.0144919. PMID: 26659590; PMCID: PMC4679185.
	Barbieri C, Whitten M, Beyer K, Schreiber H, Li M, Pakendorf B. Contrasting maternal and paternal histories in the linguistic context of Burkina Faso. Mol Biol Evol. 2012 Apr;29(4):1213-23. doi: 10.1093/molbev/msr291. Epub 2011 Nov 29. PMID: 22130972.
	Barbieri C, Vicente M, Oliveira S, Bostoen K, Rocha J, Stoneking M, Pakendorf B. Migration and interaction in a contact zone: mtDNA variation among Bantu-speakers in Southern Africa. PLoS One. 2014 Jun 5;9(6):e99117. doi: 10.1371/journal.pone.0099117. PMID: 24901532; PMCID: PMC4047067.
14	Barral-Arca R, Pischedda S, Gómez-Carballa A, Pastoriza A, Mosquera-Miguel A, López-Soto M, Martinón-Torres F, Álvarez-Iglesias V, Salas A. Meta-Analysis of Mitochondrial DNA Variation in the Iberian Peninsula. PLoS One. 2016 Jul 21;11(7):e0159735. doi: 10.1371/journal.pone.0159735. PMID: 27441366; PMCID: PMC4956223.
	Behar DM, Metspalu E, Kivisild T, Rosset S, Tzur S, Hadid Y, Yudkovsky G, Rosengarten D, Pereira L, Amorim A, Kutuev I, Gurwitz D, Bonne-Tamir B, Villems R, Skorecki K. Counting the founders: the matrilineal genetic ancestry of the Jewish Diaspora. PLoS One. 2008 Apr 30;3(4):e2062. doi: 10.1371/journal.pone.0002062. PMID: 18446216; PMCID: PMC2323359.
12	Bekada A, Arauna LR, Deba T, Calafell F, Benhamamouch S, Comas D. Genetic Heterogeneity in Algerian Human Populations. PLoS One. 2015 Sep 24;10(9):e0138453. doi: 10.1371/journal.pone.0138453. PMID: 26402429; PMCID: PMC4581715.
19	Bekada A, Fregel R, Cabrera VM, Larruga JM, Pestano J, Benhamamouch S, González AM. Introducing the Algerian mitochondrial DNA and Y-chromosome profiles into the North African landscape. PLoS One. 2013;8(2):e56775. doi: 10.1371/journal.pone.0056775. Epub 2013 Feb 19. PMID: 23431392; PMCID: PMC3576335.
	Ben Salem N, Boussetta S, de Rojas I, Moreno-Grau S, Montrreal L, Mokni N, Mahmoud I, Younes S, Daouassi N, Frih-Ayed M, Hammami A, Ben Ammar Elgaaied A, Ruiz A, Cherni L. Mitochondrial DNA and Alzheimer's disease: a first case-control study of the Tunisian population. Mol Biol Rep. 2022 Mar;49(3):1687-1700. doi: 10.1007/s11033-021-06978-7. Epub 2021 Dec 1. PMID: 34854014.
	Blench, Roger.The peopling of the Canaries by the Berbers: new data and new hypotheses, Études et Documents Berbères, vol. 45-46, no. 1-2, 2021, pp. 149-173.
40	Boattini A, Martinez-Cruz B, Sarno S, Harmant C, Useli A, Sanz P, Yang-Yao D, Manry J, Ciani G, Luiselli D, Quintana-Murci L, Comas D, Pettener D; Genographic Consortium. Uniparental markers in Italy reveal a sex-biased genetic structure and different historical strata. PLoS One. 2013 May 29;8(5):e65441. doi: 10.1371/journal.pone.0065441. PMID: 23734255; PMCID: PMC3666984.
55	Bodner M, Amory C, Olivieri A, Gandini F, Cardinali I, Lancioni H, Huber G, Xavier C, Pala M, Fichera A, Schnaller L, Gysi M, Sarno S, Pettener D, Luiselli D, Richards MB, Semino O, Achilli A, Torroni A, Parson W. Helena's Many Daughters: More Mitogenome Diversity behind the Most Common West Eurasian mtDNA Control Region Haplotype in an Extended Italian Population Sample. Int J Mol Sci. 2022 Jun …
	Brakez Z, Bosch E, Izaabel H, et al. Human mitochondrial DNA sequence variation in the Moroccan population of the Souss area. Annals of Human Biology. 2001 May-Jun;28(3):295-307. DOI: 10.1080/030144601300119106. PMID: 11393336.
24	Bravi, Claudio. “Sequence Variation of Mitochondrial DNA Control Region in North Central Venezuela.” Forensic science international. Genetics (2012): n. pag. Print.
46	Brisighelli F, A´ lvarez-Iglesias V, Fondevila M, Blanco-Verea A, Carracedo A´ , et al. (2012) Uniparental Markers of Contemporary Italian Population Reveals Details on Its Pre-Roman Heritage. PLoS ONE 7(12): e50794. doi:10.1371/journal.pone.0050794
	Cardoso S, Valverde L, Alfonso-Sánchez MA, Palencia-Madrid L, Elcoroaristizabal X, Algorta J, Catarino S, Arteta D, Herrera RJ, Zarrabeitia MT, Peña JA, de Pancorbo MM. The expanded mtDNA phylogeny of the Franco-Cantabrian region upholds the pre-neolithic genetic substrate of Basques. PLoS One. 2013 Jul 3;8(7):e67835. doi: 10.1371/journal.pone.0067835. PMID: 23844106; PMCID: PMC3700859.
49	Cardoso S, Villanueva-Millán MJ, Valverde L, Odriozola A, Aznar JM, Piñeiro-Hermida S, de Pancorbo MM. Mitochondrial DNA control region variation in an autochthonous Basque population sample from the Basque Country. Forensic Sci Int Genet. 2012 Jul;6(4):e106-8. doi: 10.1016/j.fsigen.2011.12.007. Epub 2012 Jan 23. PMID: 22277258.
7	Cerezo M, Achilli A, Olivieri A, Perego UA, Gómez-Carballa A, Brisighelli F, Lancioni H, Woodward SR, López-Soto M, Carracedo A, Capelli C, Torroni A, Salas A. Reconstructing ancient mitochondrial DNA links between Africa and Europe. Genome Res. 2012 May;22(5):821-6. doi: 10.1101/gr.134452.111. Epub 2012 Mar 27. PMID: 22454235; PMCID: PMC3337428.
70	Cherni L, Loueslati BY, Pereira L, Ennafaâ H, Amorim A, El Gaaied AB. Female gene pools of Berber and Arab neighboring communities in central Tunisia: microstructure of mtDNA variation in North Africa. Hum Biol. 2005 Feb;77(1):61-70. doi: 10.1353/hub.2005.0028. PMID: 16114817.
58	Cherni, L., Fernandes, V., Pereira, J.B., Costa, M.D., Goios, A., Frigi, S., Yacoubi-Loueslati, B., Amor, M.B., Slama, A., Amorim, A., El Gaaied, A.B.A. and Pereira, L. (2009), Post-last glacial maximum expansion from Iberia to North Africa revealed by fine characterization of mtDNA H haplogroup in Tunisia. Am. J. Phys. Anthropol., 139: 253-260. https://doi.org/10.1002/ajpa.20979
18	Cocoş R, Schipor S, Hervella M, Cianga P, Popescu R, Bănescu C, Constantinescu M, Martinescu A, Raicu F. Genetic affinities among the historical provinces of Romania and Central Europe as revealed by an mtDNA analysis. BMC Genet. 2017 Mar 7;18(1):20. doi: 10.1186/s12863-017-0487-5. PMID: 28270115; PMCID: PMC5341396.
25	Côrte-Real HB, Macaulay VA, Richards MB, Hariti G, Issad MS, Cambon-Thomsen A, Papiha S, Bertranpetit J, Sykes BC. Genetic diversity in the Iberian Peninsula determined from mitochondrial sequence analysis. Ann Hum Genet. 1996 Jul;60(4):331-50. doi: 10.1111/j.1469-1809.1996.tb01196.x. PMID: 8865993.
16	Costa MD, Cherni L, Fernandes V, Freitas F, Ammar El Gaaied AB, Pereira L. Data from complete mtDNA sequencing of Tunisian centenarians: testing haplogroup association and the "golden mean" to longevity. Mech Ageing Dev. 2009 Apr;130(4):222-6. doi: 10.1016/j.mad.2008.12.001. Epub 2008 Dec 24. PMID: 19133286.
48	Coudray C, Olivieri A, Achilli A, Pala M, Melhaoui M, Cherkaoui M, El-Chennawi F, Kossmann M, Torroni A, Dugoujon JM. The complex and diversified mitochondrial gene pool of Berber populations. Ann Hum Genet. 2009 Mar;73(2):196-214. doi: 10.1111/j.1469-1809.2008.00493.x. Epub 2008 Nov 27. PMID: 19053990.
73	De Fanti S, Barbieri C, Sarno S, Sevini F, Vianello D, Tamm E, Metspalu E, van Oven M, Hübner A, Sazzini M, Franceschi C, Pettener D, Luiselli D. Fine Dissection of Human Mitochondrial DNA Haplogroup HV Lineages Reveals Paleolithic Signatures from European Glacial Refugia. PLoS One. 2015 Dec 7;10(12):e0144391. doi: 10.1371/journal.pone.0144391. PMID: 26640946; PMCID: PMC4671665.
77	Diroma, M. A., Modi, A., Lari, M., Sineo, L., Caramelli, D., & Vai, S. (2021). New Insights Into Mitochondrial DNA Reconstruction and Variant Detection in Ancient Samples. Frontiers in Genetics, 12. https://doi.org/10.3389/fgene.2021.619950
78	Derenko M, Denisova G, Malyarchuk B, Hovhannisyan A, Khachatryan Z, Hrechdakian P, Litvinov A, Yepiskoposyan L. Insights into matrilineal genetic structure, differentiation and ancestry of Armenians based on complete mitogenome data. Mol Genet Genomics. 2019 Dec;294(6):1547-1559. doi: 10.1007/s00438-019-01596-2. Epub 2019 Aug 1. PMID: 31372716.
79	Drosou K, Collin TC, Freeman PJ, Loynes R, Freemont T. The first reported case of the rare mitochondrial haplotype H4a1 in ancient Egypt. Sci Rep. 2020 Oct 12;10(1):17037. doi: 10.1038/s41598-020-74114-9. PMID: 33046824; PMCID: PMC7550590.
22	Dubut, V., Chollet, L., Murail, P. et al. mtDNA polymorphisms in five French groups: importance of regional sampling. Eur J Hum Genet 12, 293–300 (2004). https://doi.org/10.1038/sj.ejhg.5201145
71	Ely B, Wilson JL, Jackson F, Jackson BA. African-American mitochondrial DNAs often match mtDNAs found in multiple African ethnic groups. BMC Biol. 2006 Oct 12;4:34. doi: 10.1186/1741-7007-4-34. Erratum in: BMC Biol. 2007;5:13. PMID: 17038170; PMCID: PMC1618861.
15	Elkamel S, Boussetta S, Khodjet-El-Khil H, Benammar Elgaaied A, Cherni L. Ancient and recent Middle Eastern maternal genetic contribution to North Africa as viewed by mtDNA diversity in Tunisian Arab populations. Am J Hum Biol. 2018 May;30(3):e23100. doi: 10.1002/ajhb.23100. Epub 2018 Jan 23. PMID: 29359455.
20	Ennafaa H, Cabrera VM, Abu-Amero KK, González AM, Amor MB, Bouhaha R, Dzimiri N, Elgaaïed AB, Larruga JM. Mitochondrial DNA haplogroup H structure in North Africa. BMC Genet. 2009 Feb 25;10:8. doi: 10.1186/1471-2156-10-8. PMID: 19243582; PMCID: PMC2657161.
54	Ennafaa H, Fregel R, Khodjet-El-Khil H, González AM, Mahmoudi HA, Cabrera VM, Larruga JM, Benammar-Elgaaïed A. Mitochondrial DNA and Y-chromosome microstructure in Tunisia. J Hum Genet. 2011 Oct;56(10):734-41. doi: 10.1038/jhg.2011.92. Epub 2011 Aug 11. PMID: 21833004.
4	Fadhlaoui-Zid K, Plaza S, Calafell F, et al. Mitochondrial DNA heterogeneity in Tunisian Berbers. Annals of Human Genetics. 2004 May;68(Pt 3):222-233. DOI: 10.1046/j.1529-8817.2004.00096.x. PMID: 15180702.
1	Fregel R, Cabrera VM, Larruga JM, et al. Isolation and prominent aboriginal maternal legacy in the present-day population of La Gomera (Canary Islands). European Journal of Human Genetics : EJHG. 2015 Sep;23(9):1236-1243. DOI: 10.1038/ejhg.2014.251. PMID: 25407001; PMCID: PMC4538205.
5	Fregel R, Ordóñez AC, Santana-Cabrera J, Cabrera VM, Velasco-Vázquez J, Alberto V, Moreno-Benítez MA, Delgado-Darias T, Rodríguez-Rodríguez A, Hernández JC, Pais J, González-Montelongo R, Lorenzo-Salazar JM, Flores C, Cruz-de-Mercadal MC, Álvarez-Rodríguez N, Shapiro B, Arnay M, Bustamante CD. Mitogenomes illuminate the origin and migration patterns of the indigenous people of the Canary Islands.…
	Fregel R, Pestano J, Arnay M, Cabrera VM, Larruga JM, González AM. The maternal aborigine colonization of La Palma (Canary Islands). Eur J Hum Genet. 2009 Oct;17(10):1314-24. doi: 10.1038/ejhg.2009.46. Epub 2009 Apr 1. PMID: 19337312; PMCID: PMC2986650.
44	Frigi S, Cherni L, Fadhlaoui-Zid K, Benammar-Elgaaied A. Ancient local evolution of African mtDNA haplogroups in Tunisian Berber populations. Hum Biol. 2010 Aug;82(4):367-84. doi: 10.3378/027.082.0402. PMID: 21082907.
51	FTDNA
74	1000GenomeProject
59	García O, Fregel R, Larruga JM, Álvarez V, Yurrebaso I, Cabrera VM, González AM. Using mitochondrial DNA to test the hypothesis of a European post-glacial human recolonization from the Franco-Cantabrian refuge. Heredity (Edinb). 2011 Jan;106(1):37-45. doi: 10.1038/hdy.2010.47. Epub 2010 Apr 21. PMID: 20407470; PMCID: PMC3183843.
35	García-Olivares V, Rubio-Rodríguez LA, Muñoz-Barrera A, Díaz-de Usera A, Jáspez D, Iñigo-Campos A, Rodríguez Pérez MDC, Cabrera de León A, Lorenzo-Salazar JM, González-Montelongo R, Cabrera VM, Flores C. Digging into the admixture strata of current-day Canary Islanders based on mitogenomes. iScience. 2022 Dec 29;26(1):105907. doi: 10.1016/j.isci.2022.105907. PMID: 36647378; PMCID: PMC9840145.
	Ghirotto S, Tassi F, Fumagalli E, Colonna V, Sandionigi A, Lari M, Vai S, Petiti E, Corti G, Rizzi E, De Bellis G, Caramelli D, Barbujani G. Origins and evolution of the Etruscans' mtDNA. PLoS One. 2013;8(2):e55519. doi: 10.1371/journal.pone.0055519. Epub 2013 Feb 6. PMID: 23405165; PMCID: PMC3566088.
	Gómez-Carballa A, Cerezo M, Balboa E, Heredia C, Castro-Feijóo L, Rica I, Barreiro J, Eirís J, Cabanas P, Martínez-Soto I, Fernández-Toral J, Castro-Gago M, Pombo M, Carracedo Á, Barros F, Salas A. Evolutionary analyses of entire genomes do not support the association of mtDNA mutations with Ras/MAPK pathway syndromes. PLoS One. 2011 Apr 19;6(4):e18348. doi: 10.1371/journal.pone.0018348. PMID: 21…
31	Gómez-Carballa A, Olivieri A, Behar DM, Achilli A, Torroni A, Salas A. Genetic continuity in the Franco-Cantabrian region: new clues from autochthonous mitogenomes. PLoS One. 2012;7(3):e32851. doi: 10.1371/journal.pone.0032851. Epub 2012 Mar 19. PMID: 22442672; PMCID: PMC3307710.
	González AM, Cabrera VM, Larruga JM, Tounkara A, Noumsi G, Thomas BN, Moulds JM. Mitochondrial DNA variation in Mauritania and Mali and their genetic relationship to other Western Africa populations. Ann Hum Genet. 2006 Sep;70(Pt 5):631-57. doi: 10.1111/j.1469-1809.2006.00259.x. PMID: 16907709.
17	Hartmann A, Thieme M, Nanduri LK, Stempfl T, Moehle C, Kivisild T, Oefner PJ. Validation of microarray-based resequencing of 93 worldwide mitochondrial genomes. Hum Mutat. 2009 Jan;30(1):115-22. doi: 10.1002/humu.20816. PMID: 18623076.
45	Hernández CL, Dugoujon JM, Novelletto A, Rodríguez JN, Cuesta P, Calderón R. The distribution of mitochondrial DNA haplogroup H in southern Iberia indicates ancient human genetic exchanges along the western edge of the Mediterranean. BMC Genet. 2017 May 19;18(1):46. doi: 10.1186/s12863-017-0514-6. PMID: 28525980; PMCID: PMC5437654.
67	Hernández CL, Soares P, Dugoujon JM, Novelletto A, Rodríguez JN, Rito T, Oliveira M, Melhaoui M, Baali A, Pereira L, Calderón R. Early Holocenic and Historic mtDNA African Signatures in the Iberian Peninsula: The Andalusian Region as a Paradigm. PLoS One. 2015 Oct 28;10(10):e0139784. doi: 10.1371/journal.pone.0139784. PMID: 26509580; PMCID: PMC4624789.
34	Huber N, Parson W, Dür A. Next generation database search algorithm for forensic mitogenome analyses. Forensic Sci Int Genet. 2018 Nov;37:204-214. doi: 10.1016/j.fsigen.2018.09.001. Epub 2018 Sep 9. PMID: 30241075.
62	Kefi R, Hsouna S, Ben Halim N, Lasram K, Romdhane L, Messai H, Abdelhak S. Phylogeny and genetic structure of Tunisians and their position within Mediterranean populations. Mitochondrial DNA. 2015 Aug;26(4):593-604. doi: 10.3109/19401736.2013.879649. Epub 2014 Feb 3. PMID: 24491098.
72	Kefi R, Hechmi M, Naouali C, et al. On the origin of Iberomaurusians: new data based on ancient mitochondrial DNA and phylogenetic analysis of Afalou and Taforalt populations. Mitochondrial DNA. Part A, DNA Mapping, Sequencing, and Analysis. 2018 Jan;29(1):147-157. DOI: 10.1080/24701394.2016.1258406. PMID: 28034339.
36	Kivisild T, Reidla M, Metspalu E, Rosa A, Brehm A, Pennarun E, Parik J, Geberhiwot T, Usanga E, Villems R. Ethiopian mitochondrial DNA heritage: tracking gene flow across and around the gate of tears. Am J Hum Genet. 2004 Nov;75(5):752-70. doi: 10.1086/425161. Epub 2004 Sep 27. Erratum in: Am J Hum Genet. 2006 Jun;78(6):1097. PMID: 15457403; PMCID: PMC1182106.
28	Larruga, J., Díez, F., Pinto, F. et al. Mitochondrial DNA characterisation of European isolates: The Maragatos from Spain. Eur J Hum Genet 9, 708–716 (2001). https://doi.org/10.1038/sj.ejhg.5200693
	Lefevre-Witier P, Aireche H, Benabadji M, Darlu P, Melvin K, Sevin A, Crawford MH. Genetic structure of Algerian populations. Am J Hum Biol. 2006 Jul-Aug;18(4):492-501. doi: 10.1002/ajhb.20511. PMID: 16788894.
61	Loueslati BY, Cherni L, Khodjet-Elkhil H, et al. Islands inside an island: reproductive isolates on Jerba island. American Journal of Human Biology : the Official Journal of the Human Biology Council. 2006 Jan;18(1):149-153. DOI: 10.1002/ajhb.20473. PMID: 16378336.
30	Maca-Meyer N, Cabrera VM, Arnay M, Flores C, Fregel R, González AM, Larruga JM. Mitochondrial DNA diversity in 17th-18th century remains from Tenerife (Canary Islands). Am J Phys Anthropol. 2005 Aug;127(4):418-26. doi: 10.1002/ajpa.20148. PMID: 15714457.
3	Maca-Meyer N, González AM, Pestano J, Flores C, Larruga JM, Cabrera VM. Mitochondrial DNA transit between West Asia and North Africa inferred from U6 phylogeography. BMC Genet. 2003 Oct 16;4:15. doi: 10.1186/1471-2156-4-15. PMID: 14563219; PMCID: PMC270091.
50	Maca-Meyer, N., Arnay, M., Rando, J. et al. Ancient mtDNA analysis and the origin of the Guanches. Eur J Hum Genet 12, 155–162 (2004). https://doi.org/10.1038/sj.ejhg.5201075
66	Marques SL, Goios A, Rocha AM, et al. Portuguese mitochondrial DNA genetic diversity-An update and a phylogenetic revision. Forensic Science international. Genetics. 2015 Mar;15:27-32. DOI: 10.1016/j.fsigen.2014.10.004. PMID: 25457629.
68	Martínez-Cruz B, Mendizabal I, Harmant C, de Pablo R, Ioana M, Angelicheva D, Kouvatsi A, Makukh H, Netea MG, Pamjav H, Zalán A, Tournev I, Marushiakova E, Popov V, Bertranpetit J, Kalaydjieva L, Quintana-Murci L, Comas D. Origins, admixture and founder lineages in European Roma. Eur J Hum Genet. 2016 Jun;24(6):937-43. doi: 10.1038/ejhg.2015.201. Epub 2015 Sep 16. Erratum in: Eur J Hum Genet. 202…
	Martínez-Cruzado JC, Toro-Labrador G, Viera-Vera J, Rivera-Vega MY, Startek J, Latorre-Esteves M, Román-Colón A, Rivera-Torres R, Navarro-Millán IY, Gómez-Sánchez E, Caro-González HY, Valencia-Rivera P. Reconstructing the population history of Puerto Rico by means of mtDNA phylogeographic analysis. Am J Phys Anthropol. 2005 Sep;128(1):131-55. doi: 10.1002/ajpa.20108. PMID: 15693025.
19	Matisoo-Smith EA, Gosling AL, Boocock J, Kardailsky O, Kurumilian Y, Roudesli-Chebbi S, Badre L, Morel JP, Sebaï LL, Zalloua PA. A European Mitochondrial Haplotype Identified in Ancient Phoenician Remains from Carthage, North Africa. PLoS One. 2016 May 25;11(5):e0155046. doi: 10.1371/journal.pone.0155046. PMID: 27224451; PMCID: PMC4880306.
33	Modi A, Lancioni H, Cardinali I, Capodiferro MR, Rambaldi Migliore N, Hussein A, Strobl C, Bodner M, Schnaller L, Xavier C, Rizzi E, Bonomi Ponzi L, Vai S, Raveane A, Cavadas B, Semino O, Torroni A, Olivieri A, Lari M, Pereira L, Parson W, Caramelli D, Achilli A. The mitogenome portrait of Umbria in Central Italy as depicted by contemporary inhabitants and pre-Roman remains. Sci Rep. 2020 Jul 1;1…
	Olivieri A, Achilli A, Pala M, Battaglia V, Fornarino S, Al-Zahery N, Scozzari R, Cruciani F, Behar DM, Dugoujon JM, Coudray C, Santachiara-Benerecetti AS, Semino O, Bandelt HJ, Torroni A. The mtDNA legacy of the Levantine early Upper Palaeolithic in Africa. Science. 2006 Dec 15;314(5806):1767-70. doi: 10.1126/science.1135566. PMID: 17170302.
52	Olivieri A, Sidore C, Achilli A, Angius A, Posth C, Furtwängler A, Brandini S, Capodiferro MR, Gandini F, Zoledziewska M, Pitzalis M, Maschio A, Busonero F, Lai L, Skeates R, Gradoli MG, Beckett J, Marongiu M, Mazzarello V, Marongiu P, Rubino S, Rito T, Macaulay V, Semino O, Pala M, Abecasis GR, Schlessinger D, Conde-Sousa E, Soares P, Richards MB, Cucca F, Torroni A. Mitogenome Diversity in Sard…
42	Ottoni C, Martinez-Labarga C, Vitelli L, et al. Human mitochondrial DNA variation in Southern Italy. Annals of Human Biology. 2009 Nov-Dec;36(6):785-811. DOI: 10.3109/03014460903198509. PMID: 19852679.
39	Pennarun E, Kivisild T, Metspalu E, Metspalu M, Reisberg T, Moisan JP, Behar DM, Jones SC, Villems R. Divorcing the Late Upper Palaeolithic demographic histories of mtDNA haplogroups M1 and U6 in Africa. BMC Evol Biol. 2012 Dec 3;12:234. doi: 10.1186/1471-2148-12-234. PMID: 23206491; PMCID: PMC3582464.
41	Pereira JB, Costa MD, Vieira D, Pala M, Bamford L, Harich N, Cherni L, Alshamali F, Hatina J, Rychkov S, Stefanescu G, King T, Torroni A, Soares P, Pereira L, Richards MB. Reconciling evidence from ancient and contemporary genomes: a major source for the European Neolithic within Mediterranean Europe. Proc Biol Sci. 2017 Mar 29;284(1851):20161976. doi: 10.1098/rspb.2016.1976. PMID: 28330913; PMCI…
32	Pereira L, Gonçalves J, Franco-Duarte R, Silva J, Rocha T, Arnold C, Richards M, Macaulay V. No evidence for an mtDNA role in sperm motility: data from complete sequencing of asthenozoospermic males. Mol Biol Evol. 2007 Mar;24(3):868-74. doi: 10.1093/molbev/msm004. Epub 2007 Jan 11. PMID: 17218641.
	Pereira L, Silva NM, Franco-Duarte R, Fernandes V, Pereira JB, Costa MD, Martins H, Soares P, Behar DM, Richards MB, Macaulay V. Population expansion in the North African late Pleistocene signalled by mitochondrial DNA haplogroup U6. BMC Evol Biol. 2010 Dec 21;10:390. doi: 10.1186/1471-2148-10-390. PMID: 21176127; PMCID: PMC3016289.
53	Plaza S, Calafell F, Helal A, Bouzerna N, Lefranc G, Bertranpetit J, Comas D. Joining the pillars of Hercules: mtDNA sequences show multidirectional gene flow in the western Mediterranean. Ann Hum Genet. 2003 Jul;67(Pt 4):312-28. doi: 10.1046/j.1469-1809.2003.00039.x. PMID: 12914566.
57	Prieto L, Zimmermann B, Goios A, Rodriguez-Monge A, Paneto GG, Alves C, Alonso A, Fridman C, Cardoso S, Lima G, Anjos MJ, Whittle MR, Montesino M, Cicarelli RM, Rocha AM, Albarrán C, de Pancorbo MM, Pinheiro MF, Carvalho M, Sumita DR, Parson W. The GHEP-EMPOP collaboration on mtDNA population data--A new resource for forensic casework. Forensic Sci Int Genet. 2011 Mar;5(2):146-51. doi: 10.1016/j.…
64	Pritchard JK, Stephens M, Donnelly P. Inference of population structure using multilocus genotype data. Genetics. 2000 Jun;155(2):945-59. doi: 10.1093/genetics/155.2.945. PMID: 10835412; PMCID: PMC1461096.
56	Rakha A, Fatima, Peng MS, Adan A, Bi R, Yasmin M, Yao YG. mtDNA sequence diversity of Hazara ethnic group from Pakistan. Forensic Sci Int Genet. 2017 Sep;30:e1-e5. doi: 10.1016/j.fsigen.2017.07.004. Epub 2017 Jul 10. PMID: 28734663.
	Rambaldi Migliore N, Colombo G, Capodiferro MR, Mazzocchi L, Chero Osorio AM, Raveane A, Tribaldos M, Perego UA, Mendizábal T, Montón AG, Lombardo G, Grugni V, Garofalo M, Ferretti L, Cereda C, Gagliardi S, Cooke R, Smith-Guzmán N, Olivieri A, Aram B, Torroni A, Motta J, Semino O, Achilli A. Weaving Mitochondrial DNA and Y-Chromosome Variation in the Panamanian Genetic Canvas. Genes (Basel). 2021…
6	Rando JC, Cabrera VM, Larruga JM, Hernández M, González AM, Pinto F, Bandelt HJ. Phylogeographic patterns of mtDNA reflecting the colonization of the Canary Islands. Ann Hum Genet. 1999 Sep;63(Pt 5):413-28. doi: 10.1046/j.1469-1809.1999.6350413.x. PMID: 10735583.
	Rando JC, Pinto F, González AM, Hernández M, Larruga JM, Cabrera VM, Bandelt HJ. Mitochondrial DNA analysis of northwest African populations reveals genetic exchanges with European, near-eastern, and sub-Saharan populations. Ann Hum Genet. 1998 Nov;62(Pt 6):531-50. doi: 10.1046/j.1469-1809.1998.6260531.x. PMID: 10363131.
	Raule N, Sevini F, Li S, Barbieri A, Tallaro F, Lomartire L, Vianello D, Montesanto A, Moilanen JS, Bezrukov V, Blanché H, Hervonen A, Christensen K, Deiana L, Gonos ES, Kirkwood TB, Kristensen P, Leon A, Pelicci PG, Poulain M, Rea IM, Remacle J, Robine JM, Schreiber S, Sikora E, Eline Slagboom P, Spazzafumo L, Antonietta Stazi M, Toussaint O, Vaupel JW, Rose G, Majamaa K, Perola M, Johnson TE, B…
9	Rhouda T, Martínez-Redondo D, Gómez-Durán A, et al. Moroccan mitochondrial genetic background suggests prehistoric human migrations across the Gibraltar Strait. Mitochondrion. 2009 Nov;9(6):402-407. DOI: 10.1016/j.mito.2009.07.003. PMID: 19631765.
63	Richard C, Pennarun E, Kivisild T, Tambets K, Tolk HV, Metspalu E, Reidla M, Chevalier S, Giraudet S, Lauc LB, Pericić M, Rudan P, Claustres M, Journel H, Dorval I, Müller C, Villems R, Chaventré A, Moisan JP. An mtDNA perspective of French genetic variation. Ann Hum Biol. 2007 Jan-Feb;34(1):68-79. doi: 10.1080/03014460601076098. PMID: 17536756.
2	Richards M, Macaulay V, Hickey E, Vega E, Sykes B, Guida V, Rengo C, Sellitto D, Cruciani F, Kivisild T, Villems R, Thomas M, Rychkov S, Rychkov O, Rychkov Y, Gölge M, Dimitrov D, Hill E, Bradley D, Romano V, Calì F, Vona G, Demaine A, Papiha S, Triantaphyllidis C, Stefanescu G, Hatina J, Belledi M, Di Rienzo A, Novelletto A, Oppenheim A, Nørby S, Al-Zaheri N, Santachiara-Benerecetti S, Scozari R…
65	Rodríguez-Varela R, Günther T, Krzewińska M, Storå J, Gillingwater TH, MacCallum M, Arsuaga JL, Dobney K, Valdiosera C, Jakobsson M, Götherström A, Girdland-Flink L. Genomic Analyses of Pre-European Conquest Human Remains from the Canary Islands Reveal Close Affinity to Modern North Africans. Curr Biol. 2018 May 21;28(10):1677-1679. doi: 10.1016/j.cub.2018.04.083. Erratum for: Curr Biol. 2017 Nov…
60	Sans, M., Figueiro, G., Bonilla, C., Bertoni, B., Cappetta, M., Artagaveytia, N., Ackermann, E., Mut, P., & Hidalgo, P. C. . (2021). Genetic ancestry and social stratification in Montevideo, Uruguay. Revista Argentina De Antropología Biológica, 23(1), 029. https://doi.org/10.24215/18536387e029
8	Santana J, Fregel R, Lightfoot E, Morales J, Alamón M, Guillén J, Moreno M, Rodríguez A. The early colonial atlantic world: New insights on the African Diaspora from isotopic and ancient DNA analyses of a multiethnic 15th-17th century burial population from the Canary Islands, Spain. Am J Phys Anthropol. 2016 Feb;159(2):300-12. doi: 10.1002/ajpa.22879. Epub 2015 Oct 12. PMID: 26458007.
29	Santos C, Fregel R, Cabrera VM, Alvarez L, Larruga JM, Ramos A, López MA, Pilar Aluja M, González AM. Mitochondrial DNA and Y-chromosome structure at the Mediterranean and Atlantic façades of the Iberian Peninsula. Am J Hum Biol. 2014 Mar-Apr;26(2):130-41. doi: 10.1002/ajhb.22497. Epub 2013 Dec 26. PMID: 24375863.
75	Santos C, Fregel R, Cabrera VM, González AM, Larruga JM, Lima M. Mitochondrial DNA patterns in the Macaronesia islands: Variation within and among archipelagos. Am J Phys Anthropol. 2010 Apr;141(4):610-9. doi: 10.1002/ajpa.21180. PMID: 19927277.
76	Scheible M, Just R, Sturk-Andreaggi K, et al. The mitochondrial landscape of African Americans: An examination of more than 2500 control region haplotypes from 22 U.S. locations. Forensic Science international. Genetics. 2016 May;22:139-148. DOI: 10.1016/j.fsigen.2016.01.002. PMID: 26919661.
38	Schönberg A, Theunert C, Li M, Stoneking M, Nasidze I. High-throughput sequencing of complete human mtDNA genomes from the Caucasus and West Asia: high diversity and demographic inferences. Eur J Hum Genet. 2011 Sep;19(9):988-94. doi: 10.1038/ejhg.2011.62. Epub 2011 Apr 13. PMID: 21487439; PMCID: PMC3179362.
43	Secher B, Fregel R, Larruga JM, Cabrera VM, Endicott P, Pestano JJ, González AM. The history of the North African mitochondrial DNA haplogroup U6 gene flow into the African, Eurasian and American continents. BMC Evol Biol. 2014 May 19;14:109. doi: 10.1186/1471-2148-14-109. PMID: 24885141; PMCID: PMC4062890.
27	Seoane M, Mosquera-Miguel A, Gonzalez T, Fraga M, Salas A, Costoya JA. The mitochondrial genome is a "genetic sanctuary" during the oncogenic process. PLoS One. 2011;6(8):e23327. doi: 10.1371/journal.pone.0023327. Epub 2011 Aug 17. PMID: 21858071; PMCID: PMC3157371.
13	Silva M, Oteo-García G, Martiniano R, Guimarães J, von Tersch M, Madour A, Shoeib T, Fichera A, Justeau P, Foody MGB, McGrath K, Barrachina A, Palomar V, Dulias K, Yau B, Gandini F, Clarke DJ, Rosa A, Brehm A, Flaquer A, Rito T, Olivieri A, Achilli A, Torroni A, Gómez-Carballa A, Salas A, Bryk J, Ditchfield PW, Alexander M, Pala M, Soares PA, Edwards CJ, Richards MB. Biomolecular insights into No…
	Soares P, Alshamali F, Pereira JB, Fernandes V, Silva NM, Afonso C, Costa MD, Musilová E, Macaulay V, Richards MB, Cerny V, Pereira L. The Expansion of mtDNA Haplogroup L3 within and out of Africa. Mol Biol Evol. 2012 Mar;29(3):915-27. doi: 10.1093/molbev/msr245. Epub 2011 Nov 16. PMID: 22096215.
	Tajima A, Hamaguchi K, Terao H, Oribe A, Perrotta VM, Baez CA, Arias JR, Yoshimatsu H, Sakata T, Horai S. Genetic background of people in the Dominican Republic with or without obese type 2 diabetes revealed by mitochondrial DNA polymorphism. J Hum Genet. 2004;49(9):495-499. doi: 10.1007/s10038-004-0179-7. Epub 2004 Aug 5. PMID: 15368103.
69	Trovoada MJ, Pereira L, Gusmão L, Abade A, Amorim A, Prata MJ. Pattern of mtDNA variation in three populations from São Tomé e Príncipe. Ann Hum Genet. 2004 Jan;68(Pt 1):40-54. doi: 10.1046/j.1529-8817.2003.00070.x. PMID: 14748829.
23	Turchi C, Buscemi L, Giacchino E, Onofri V, Fendt L, Parson W, Tagliabracci A. Polymorphisms of mtDNA control region in Tunisian and Moroccan populations: an enrichment of forensic mtDNA databases with Northern Africa data. Forensic Sci Int Genet. 2009 Jun;3(3):166-72. doi: 10.1016/j.fsigen.2009.01.014. Epub 2009 Feb 25. PMID: 19414164.
10	Turchi, C., Buscemi, L., Previderè, C. et al. Italian mitochondrial DNA database: results of a collaborative exercise and proficiency testing. Int J Legal Med 122, 199–204 (2008). https://doi.org/10.1007/s00414-007-0207-1
37	Varano S, Gaspari L, De Angelis F, Scano G, Contini I, Martínez-Labarga C, Rickards O. Mitochondrial characterisation of two Spanish populations from the Vera and Bejar valleys (Central Spain). Ann Hum Biol. 2018 Sep-Dec;45(6-8):531-539. doi: 10.1080/03014460.2018.1559355. PMID: 30558455.
